# Supplementary material for: Site specific redox properties in ligand differentiated di-nickel complexes inspired by the acetyl CoA synthase active site
Source: Royal Society of Chemistry journal article supplement (doi:10.1039/d4dt00306c), 2024-01-01
Supplement: d4dt00306c1.pdf [file d4dt00306c1.pdf]

Supporting Information for:

Site Specific Redox Properties in Ligand Differentiated Di-Nickel Complexes Inspired by the Acetyl CoA Synthase Active Site

Manuel Quiroz, Manish Jana, Kaiyang Liu, Nattamai Bhuvanesh, Michael B. Hall and Marcetta Y. Darensbourg\*

*Department of Chemistry, Texas A&M University, College Station, Texas 77843, United States*

## **Table of Contents**

|                                                                                                                        |        |
|------------------------------------------------------------------------------------------------------------------------|--------|
| <sup>1</sup> H NMR spectroscopy.....                                                                                   | S2-3   |
| UV-Vis spectroscopy.....                                                                                               | S3     |
| ESI-MS data with isotopic bundles.....                                                                                 | S4     |
| Electrochemical data from cyclic voltammograms with selected multiple scan rate studies.....                           | S5-7   |
| Crystallographic refinement details.....                                                                               | S8     |
| Selected bond length and angles from x-ray crystal structures of <b>1</b> , <b>2<sup>2-</sup></b> , and <b>3</b> ..... | S9     |
| X-ray crystal structures of <b>1</b> , <b>2<sup>2-</sup></b> , and <b>3</b> and packing diagrams.....                  | S10-12 |
| X-ray crystal structure of <b>1<sub>O2</sub></b> and packing diagrams.....                                             | S13    |
| Crystallographic refinement details of <b>1<sub>O2</sub></b> .....                                                     | S14    |
| Comparison of experimental and calculated XRD data <b>1</b> , <b>2<sup>2-</sup></b> , and <b>3</b> .....               | S15    |
| ESP Maps and Spin density plots.....                                                                                   | S16    |
| TD-DFT calculated electronic absorption spectrum of <b>1<sup>+</sup></b> .....                                         | S16    |
| Selected bond angles and lengths for the previously reported donor and receiver synthons.....                          | S17    |
| Computational Coordinates .....                                                                                        | S17-30 |
| References.....                                                                                                        | S31    |

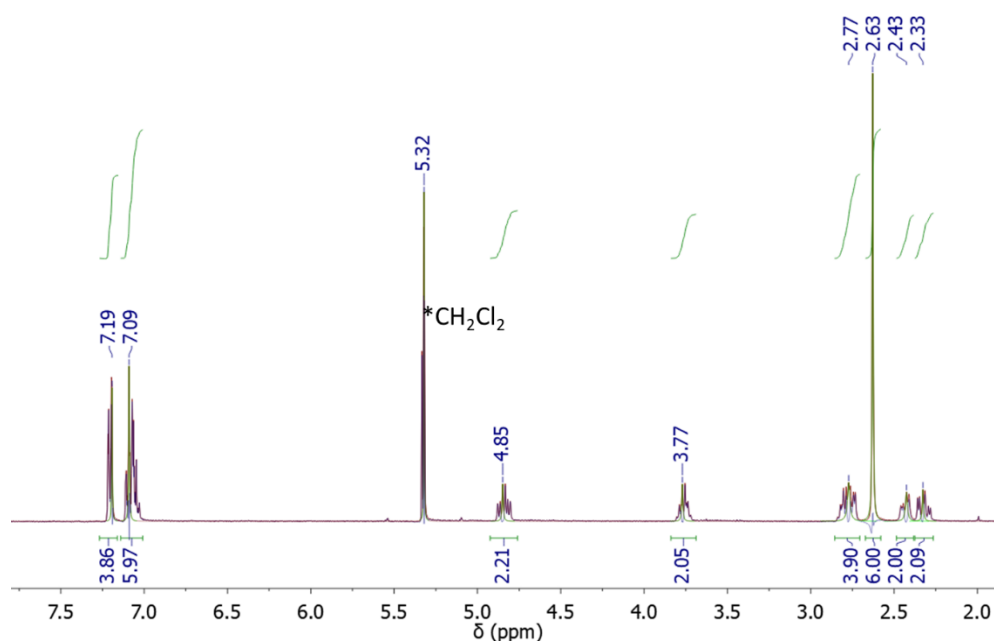

Figure S1.  $^1\text{H}$  NMR spectrum for Ni(bme-dame)-Ni(dpdt) (**1**).

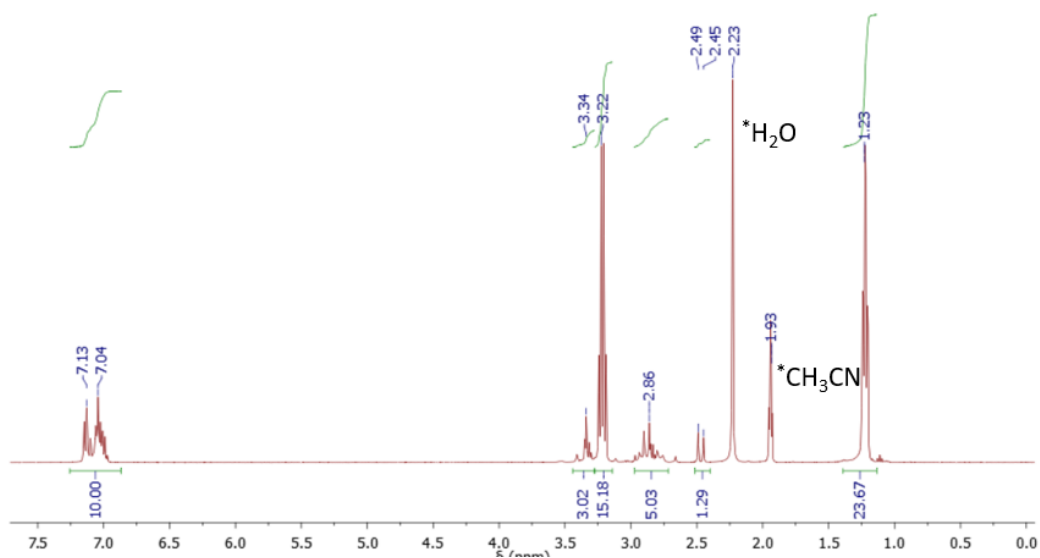

Figure S2.  $^1\text{H}$  NMR spectrum for [Ni(ema)-Ni(dpdt)][NEt<sub>4</sub>]<sub>2</sub> (**2<sup>2-</sup>**).

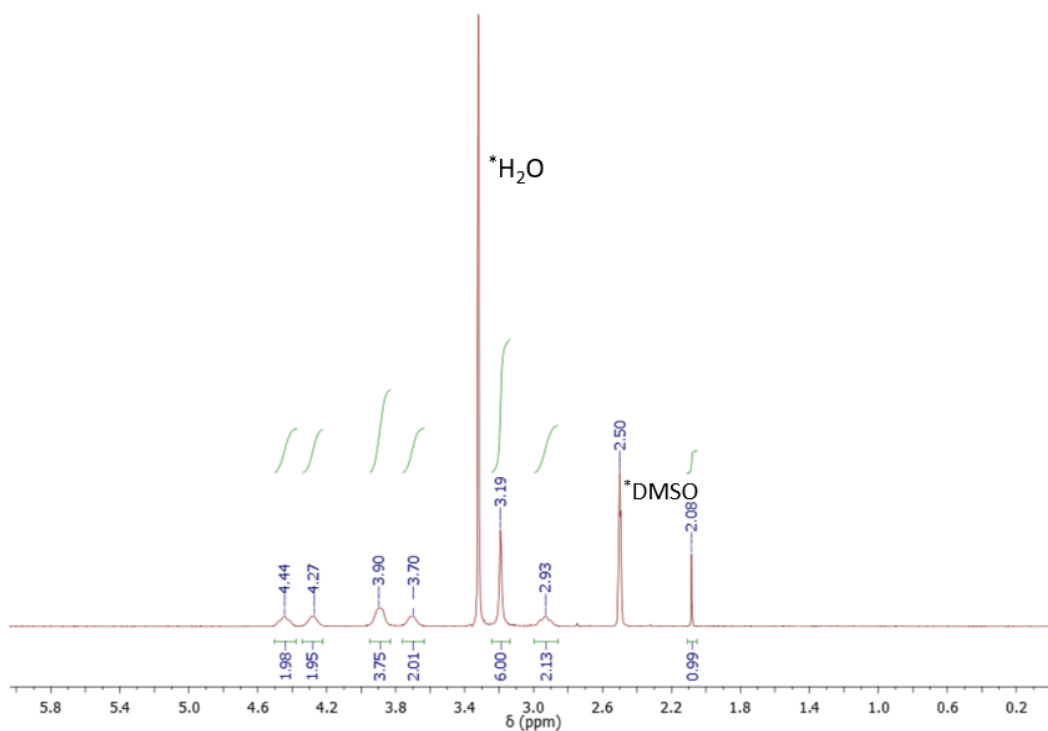

**Figure S3.**  $^1\text{H}$  NMR spectrum for Ni(bme-dame)-Ni(mnt) (**3**).

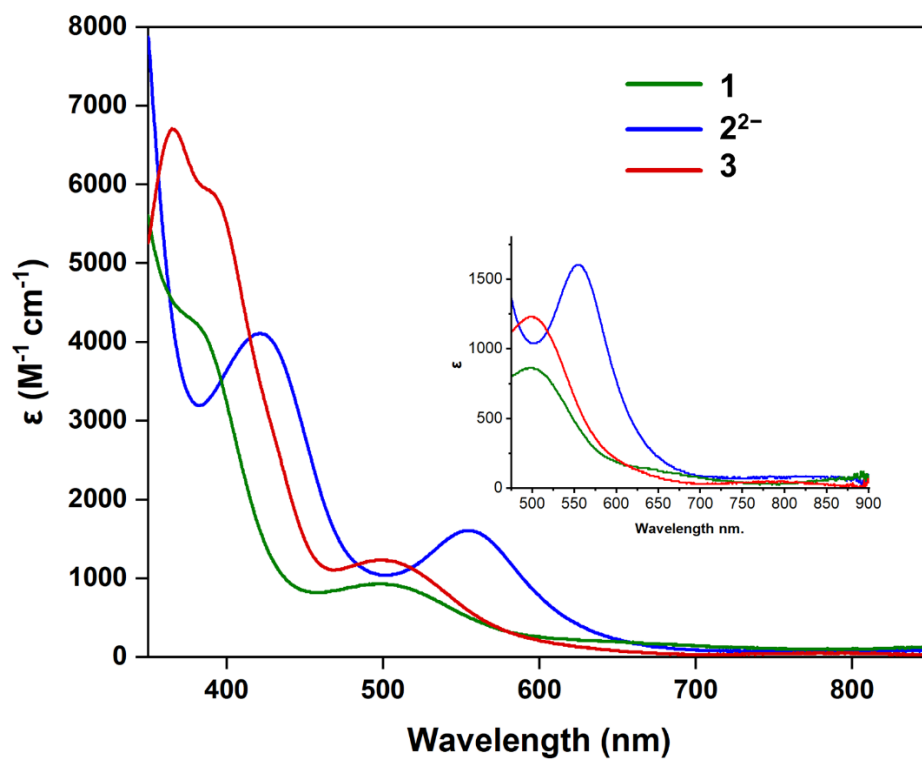

**Figure S4.** UV-vis absorption spectra of **1**,  $2^{2-}$ , and **3** in acetonitrile. Inset: expanded spectra in the visible range.

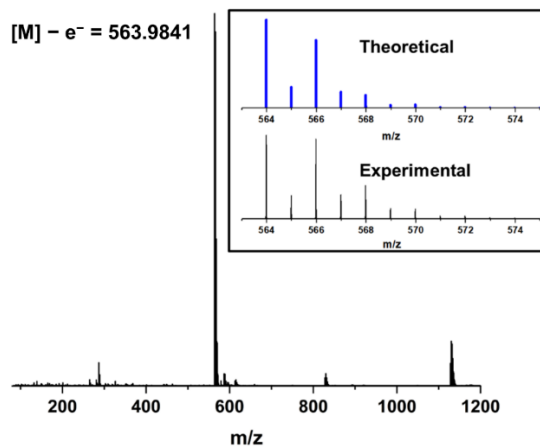

**Figure S5.** Positive-ion ESI mass spectrum of **1** in  $\text{CH}_2\text{Cl}_2$ ; inset shows theoretical and experimental isotopic distributions for  $1^+$ .

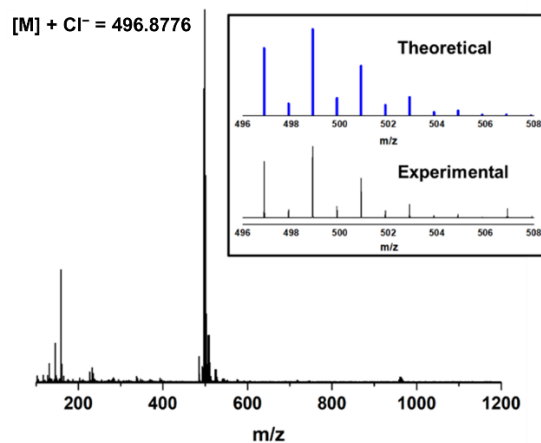

**Figure S6.** Negative-ion ESI mass spectrum of **3** in  $\text{CH}_3\text{CN}$ ; inset shows theoretical and experimental isotopic distributions for **3**.

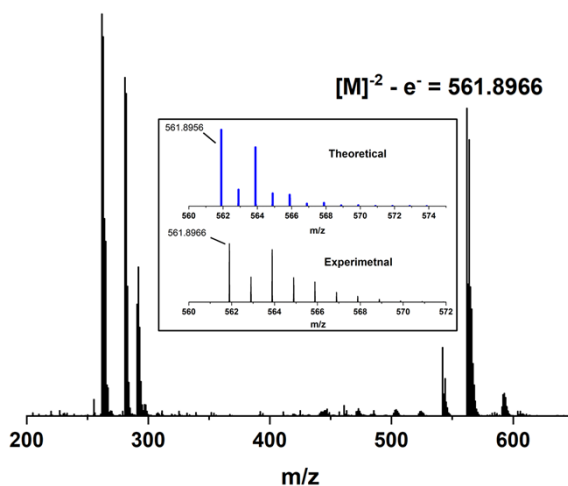

**Figure S7.** Negative-ion ESI mass spectrum of  $2^{2-}$  in  $\text{CH}_3\text{CN}$ ; inset shows theoretical and experimental isotopic distributions for  $2^{2-} + \text{Cl}^-$ .

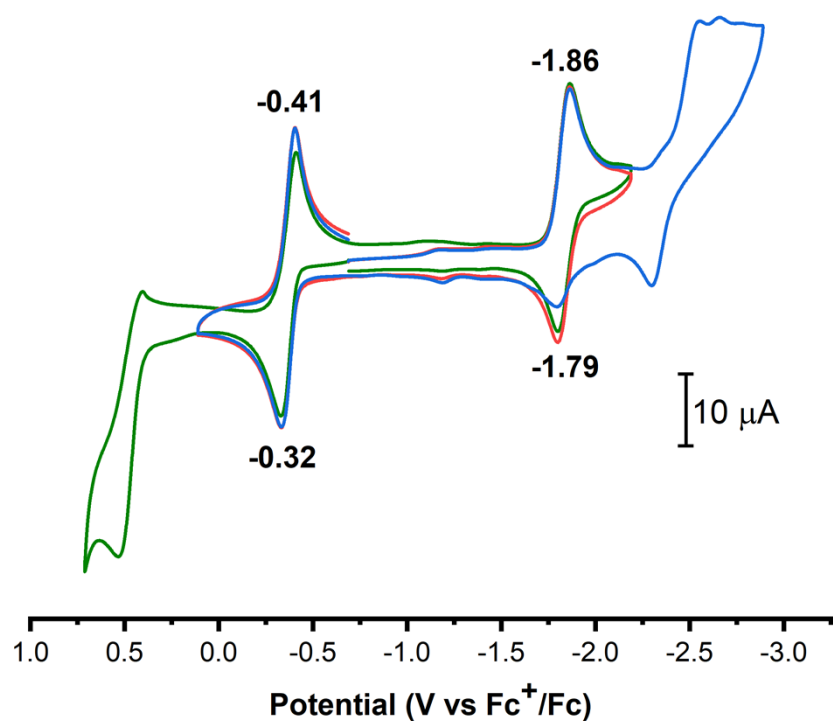

**Figure S8.** Stacked CV plots of **1** with varying potential windows in  $\text{CH}_3\text{CN}$ .

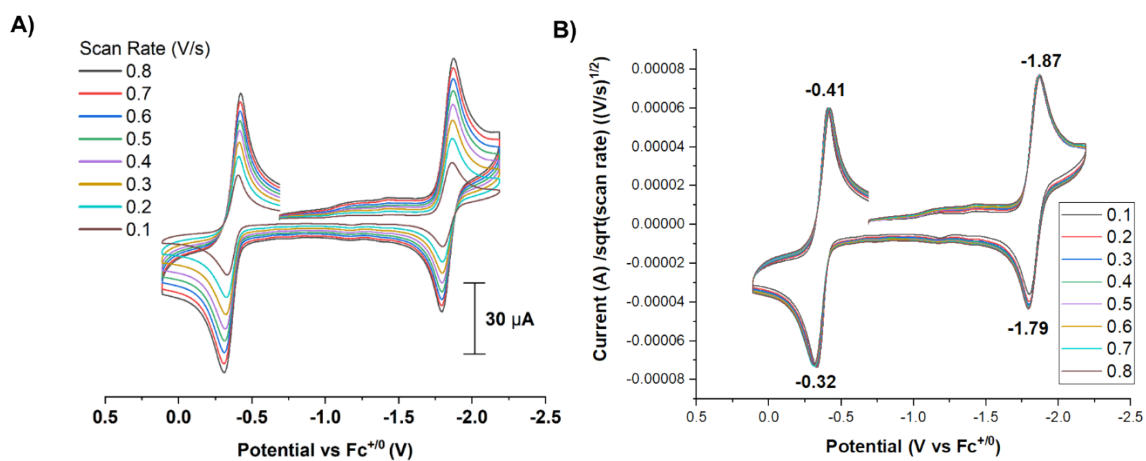

**Figure S9.** A) CV of Complex **1** at different scan rate (V/s). B) CVs of complex **1** are normalized to the square root of scan rate for direct comparison.

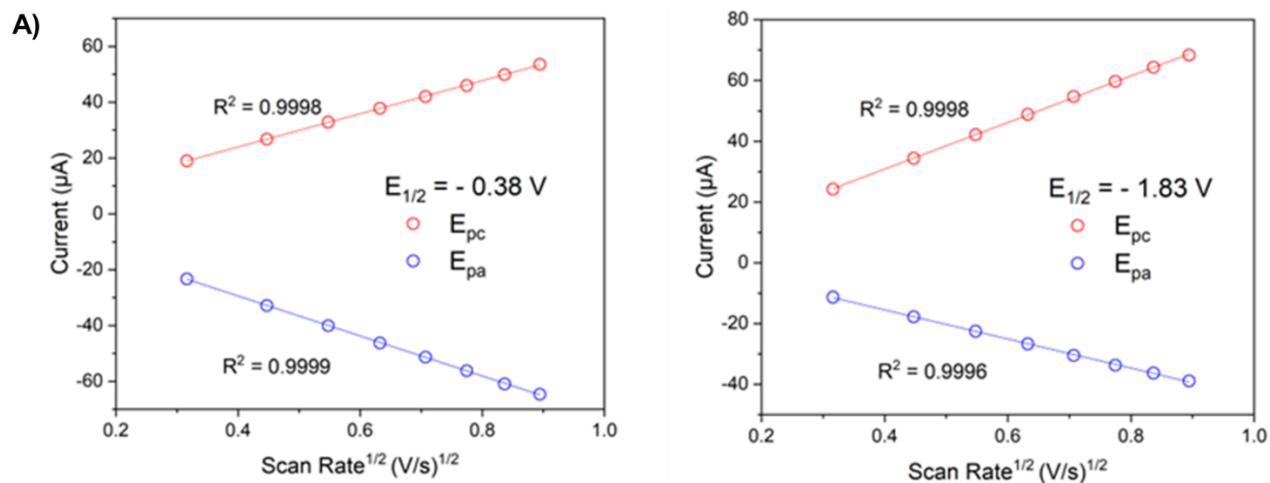

B) **For irreversible system:**

$$i_p = (2.99 \times 10^5) n (an_\alpha)^{1/2} A D_0^{1/2} C_0^* v^{1/2}$$

Where,  $i_p$  = current maximum in amps,  $n$  = number of electrons transferred in the redox event (usually 1),  $A$  = electrode area in  $\text{cm}^2$ ,  $D_0$  = diffusion coefficient in  $\text{cm}^2/\text{s}$ ,  $C_0^*$  = concentration in  $\text{mol}/\text{cm}^3$ ,  $v$  = scan rate in  $\text{V}/\text{s}$ ,  $\alpha$  = electron transfer coefficient.

**For reversible system:  $\alpha = 1$**

$$i_p = (2.69 \times 10^5) n^{3/2} A D_0^{1/2} C_0^* v^{1/2}$$

**Figure S10.** A) Plot of peak current vs. square root of scan rate of **1** using Randles-Sevcik Equation. B) Equations showing the relationship between peak current and square root of scan rate for reversible and irreversible systems.

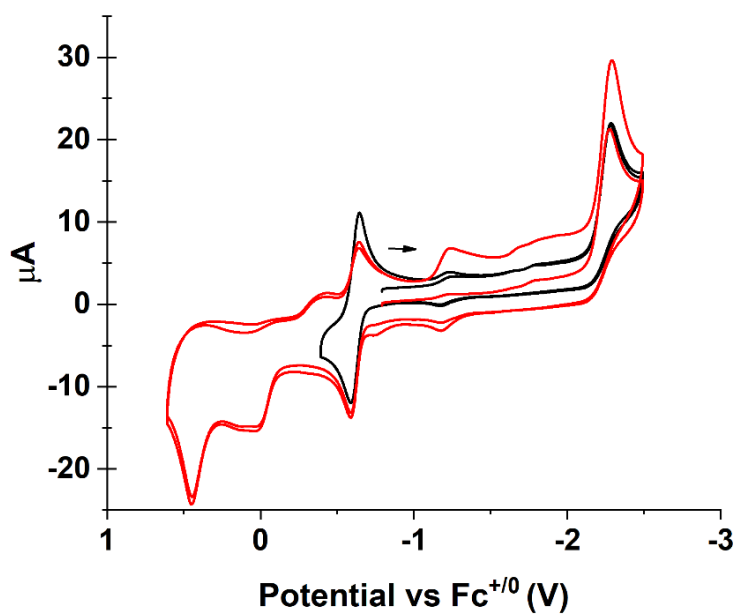

**Figure S11.** Stacked CV plots of **2<sup>2-</sup>** with varying potential windows in  $\text{CH}_3\text{CN}$ .

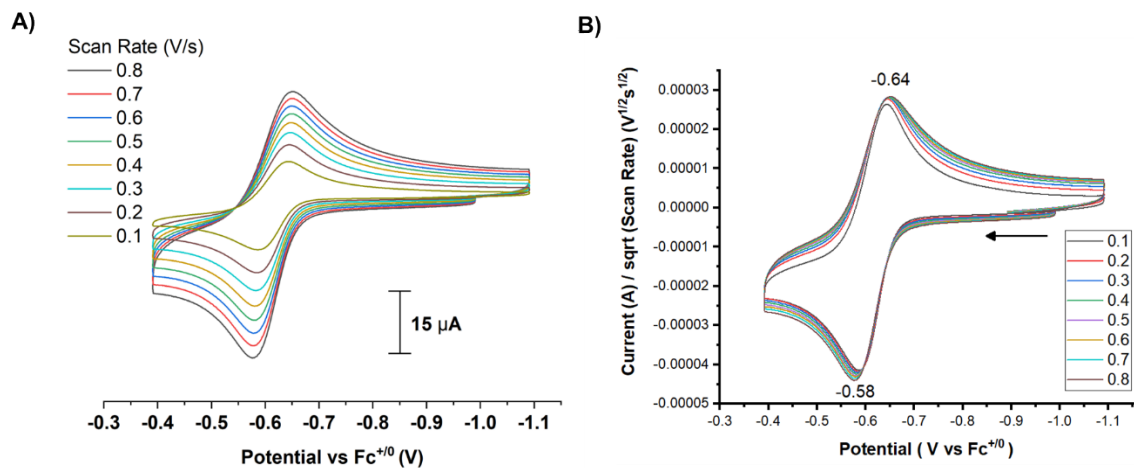

**Figure S12.** A) CV of Complex  $2^{2-}$  at different scan rate (V/s). B) CVs of complex  $2^{2-}$  are normalized to the square root of scan rate for direct comparison.

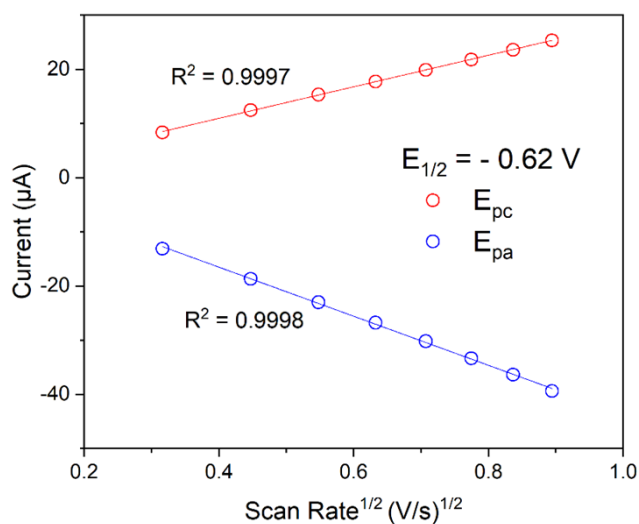

**Figure S13.** Plot of peak current vs. square root of scan rate of  $2^{2-}$ .

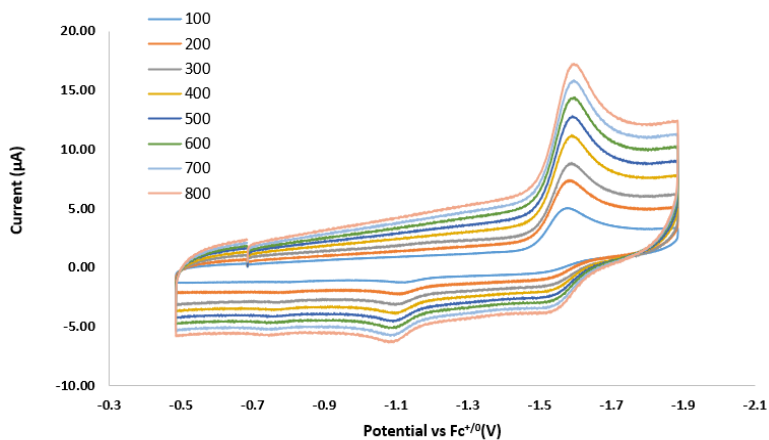

**Figure S14.** Scan rate dependence for the reduction event of **3** in  $CH_3CN$ .

**Table S1.** Crystal data and structure refinement for **1**, **2<sup>2-</sup>**, and **3**.

|                                             | <b>1</b>                                                                                      | <b>2<sup>2-</sup></b>                                                                        | <b>3</b>                                                                      |
|---------------------------------------------|-----------------------------------------------------------------------------------------------|----------------------------------------------------------------------------------------------|-------------------------------------------------------------------------------|
| Identification code                         | Ni(bme-dame)-Ni(dpdt)                                                                         | Ni(ema)-Ni(dpdt)                                                                             | Ni(bme-dame)-Ni(mnt)                                                          |
| Empirical formula                           | C <sub>24</sub> H <sub>32</sub> Cl <sub>4</sub> N <sub>2</sub> Ni <sub>2</sub> S <sub>4</sub> | C <sub>36</sub> H <sub>58</sub> N <sub>4</sub> Ni <sub>2</sub> O <sub>2</sub> S <sub>4</sub> | C <sub>12</sub> H <sub>18</sub> N <sub>4</sub> Ni <sub>2</sub> S <sub>4</sub> |
| Formula weight                              | 735.97                                                                                        | 824.52                                                                                       | 463.96                                                                        |
| Temperature/K                               | 110.00                                                                                        | 110.00                                                                                       | 110.00                                                                        |
| Crystal system                              | monoclinic                                                                                    | triclinic                                                                                    | triclinic                                                                     |
| Space group                                 | P2 <sub>1</sub> /n                                                                            | P-1                                                                                          | P-1                                                                           |
| a/Å                                         | 17.580(2)                                                                                     | 13.2528(5)                                                                                   | 8.2002(3)                                                                     |
| b/Å                                         | 9.3786(10)                                                                                    | 16.1861(7)                                                                                   | 9.6581(3)                                                                     |
| c/Å                                         | 18.147(2)                                                                                     | 20.3139(8)                                                                                   | 10.9978(4)                                                                    |
| α/°                                         | 90                                                                                            | 83.934(2)                                                                                    | 94.2260(10)                                                                   |
| β/°                                         | 91.065(4)                                                                                     | 70.9880(10)                                                                                  | 93.7670(10)                                                                   |
| γ/°                                         | 90                                                                                            | 68.434(2)                                                                                    | 100.8030(10)                                                                  |
| Volume/Å <sup>3</sup>                       | 2991.5(6)                                                                                     | 3831.0(3)                                                                                    | 850.43(5)                                                                     |
| Z                                           | 4                                                                                             | 4                                                                                            | 2                                                                             |
| ρ <sub>calc</sub> /g/cm <sup>3</sup>        | 1.634                                                                                         | 1.430                                                                                        | 1.812                                                                         |
| μ/mm <sup>-1</sup>                          | 1.914                                                                                         | 1.239                                                                                        | 2.703                                                                         |
| F(000)                                      | 1512.0                                                                                        | 1752.0                                                                                       | 476.0                                                                         |
| Crystal size/mm <sup>3</sup>                | 0.381 × 0.067 × 0.041                                                                         | 0.519 × 0.482 × 0.322                                                                        | 0.3 × 0.3 × 0.3                                                               |
| Radiation                                   | MoKα (λ = 0.71073)                                                                            | MoKα (λ = 0.71073)                                                                           | MoKα (λ = 0.71073)                                                            |
| 2θ range for data collection/°              | 4.89 to 50                                                                                    | 3.57 to 55.136                                                                               | 3.726 to 60.258                                                               |
| Index ranges                                | -20 ≤ h ≤ 20, -10 ≤ k ≤ 11, -21 ≤ l ≤ 21                                                      | -17 ≤ h ≤ 17, -21 ≤ k ≤ 21, -26 ≤ l ≤ 26                                                     | -11 ≤ h ≤ 11, -13 ≤ k ≤ 13, -15 ≤ l ≤ 15                                      |
| Reflections collected                       | 62967                                                                                         | 149361                                                                                       | 57235                                                                         |
| Independent reflections                     | 5250 [R <sub>int</sub> = 0.0450, R <sub>sigma</sub> = 0.0181]                                 | 17644 [R <sub>int</sub> = 0.0463, R <sub>sigma</sub> = 0.0284]                               | 5008 [R <sub>int</sub> = 0.0388, R <sub>sigma</sub> = 0.0193]                 |
| Data/restraints/parameters                  | 5250/14/346                                                                                   | 17644/595/961                                                                                | 5008/0/201                                                                    |
| Goodness-of-fit on F <sup>2</sup>           | 1.067                                                                                         | 1.059                                                                                        | 1.085                                                                         |
| Final R indexes [I ≥ 2σ (I)]                | R <sub>1</sub> = 0.0246 <sup>a</sup> , wR <sub>2</sub> = 0.0541 <sup>b</sup>                  | R <sub>1</sub> = 0.0290 <sup>a</sup> , wR <sub>2</sub> = 0.0682 <sup>b</sup>                 | R <sub>1</sub> = 0.0215 <sup>a</sup> , wR <sub>2</sub> = 0.0426 <sup>b</sup>  |
| Final R indexes [all data]                  | R <sub>1</sub> = 0.0278 <sup>a</sup> , wR <sub>2</sub> = 0.0567 <sup>b</sup>                  | R <sub>1</sub> = 0.0399 <sup>a</sup> , wR <sub>2</sub> = 0.0718 <sup>b</sup>                 | R <sub>1</sub> = 0.0269 <sup>a</sup> , wR <sub>2</sub> = 0.0453 <sup>b</sup>  |
| Largest diff. peak/hole / e Å <sup>-3</sup> | 0.97/-0.65                                                                                    | 0.63/-0.81                                                                                   | 0.46/-0.35                                                                    |

<sup>a</sup>R<sub>1</sub> = Σ(|F<sub>o</sub> - |F<sub>c</sub>||) / Σ|F<sub>o</sub>|. <sup>b</sup>wR<sub>2</sub> = [Σ[w(F<sub>o</sub><sup>2</sup> - F<sub>c</sub><sup>2</sup>)<sup>2</sup>] / Σ[w(F<sub>o</sub><sup>2</sup>)]]<sup>1/2</sup>, w = 1/[σ<sup>2</sup>(F<sub>o</sub><sup>2</sup>) + (ap)<sup>2</sup> + bp], where p = [max(F<sub>o</sub><sup>2</sup>, 0) + 2F<sub>c</sub><sup>2</sup>]/3.



**Table S2.** Experimental XRD data for **1**, **2<sup>2-</sup>**, and **3**.

| <b>Distances (Å)</b>             | <b>1</b>           | <b>2<sup>2-</sup></b> | <b>3</b>    |
|----------------------------------|--------------------|-----------------------|-------------|
| Ni1–Ni2                          | 2.7202(5)          | 2.6885(6)             | 2.7871(3)   |
| Ni1–S1                           | 2.1562(7)          | 2.1383(5)             | 2.1436(4)   |
| Ni1–S2                           | 2.1651(6)          | 2.1446(7)             | 2.1544(4)   |
| Ni1–N1                           | 1.951(2)           | 1.8444(2)             | 1.938(1)    |
| Ni1–N2                           | 1.952(2)           | 1.838(2)              | 1.932(1)    |
| Ni2–S1                           | 2.2398(6)          | 2.2611(6)             | 2.2412(4)   |
| Ni2–S2                           | 2.2398(7)          | 2.2809(5)             | 2.2302(4)   |
| Ni2–S3                           | 2.1339(7)          | 2.1338(5)             | 2.1497(4)   |
| Ni2–S4                           | 2.1461(6)          | 2.1340(6)             | 2.1493(4)   |
| S3–C1                            | 1.766(2)           | 1.772(2)              | 1.738(2)    |
| S4–C2                            | 1.764(2)           | 1.760(2)              | 1.737(1)    |
| C1–C2                            | 1.348(3)           | 1.356(2)              | 1.361(2)    |
| Ni1 <sub>disp</sub> <sup>a</sup> | 0.250              | 0.150                 | 0.207       |
| <b>Angles</b>                    |                    |                       |             |
| S1–Ni1–S2                        | 85.32(2)           | 90.18(2)              | 86.36(3)    |
| S1–Ni2–S2                        | 81.64(2)           | 83.80(2)              | 82.26(3)    |
| S1–Ni2–S3                        | 92.33(2)           | 91.24(2)              | 92.24(1)    |
| S2–Ni2–S4                        | 94.94(2)           | 94.00(2)              | 92.14(1)    |
| S3–Ni2–S4                        | 91.22(2)           | 90.81(2)              | 93.39(2)    |
| Hinge <sup>b</sup>               | 111.82             | 114.08                | 117.98      |
| <b>Space Group</b>               | P2 <sub>1</sub> /n | p $\bar{1}$           | p $\bar{1}$ |

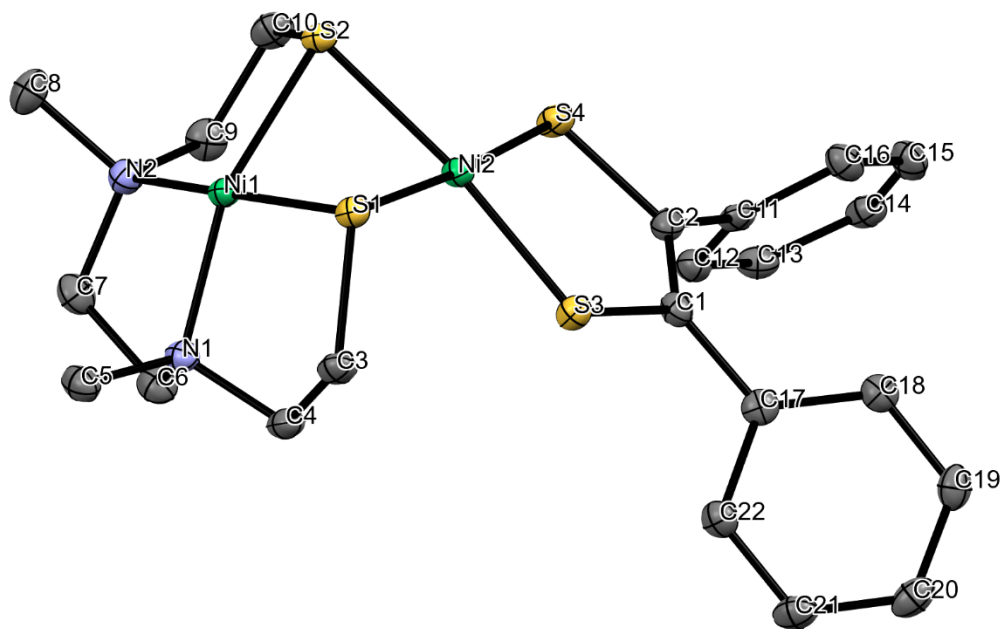

**Figure S15.** Thermal ellipsoid plot of **1** (50%, hydrogens and solvent molecules omitted for clarity).

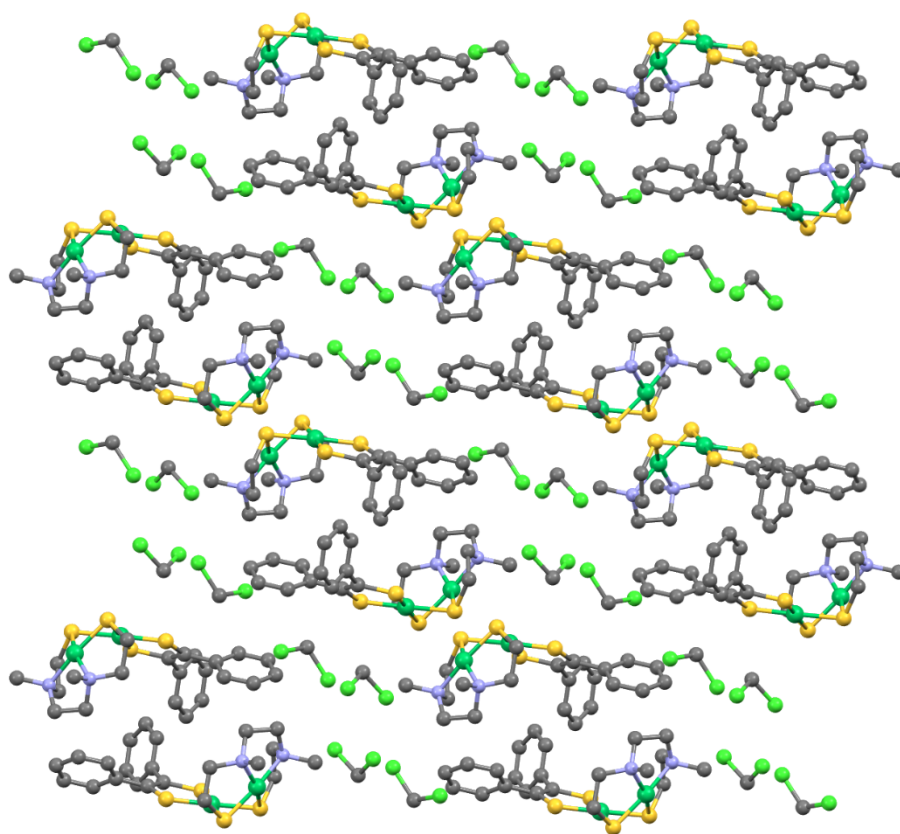

**Figure S16.** X-ray crystal packing of **1** along the *b* axis.

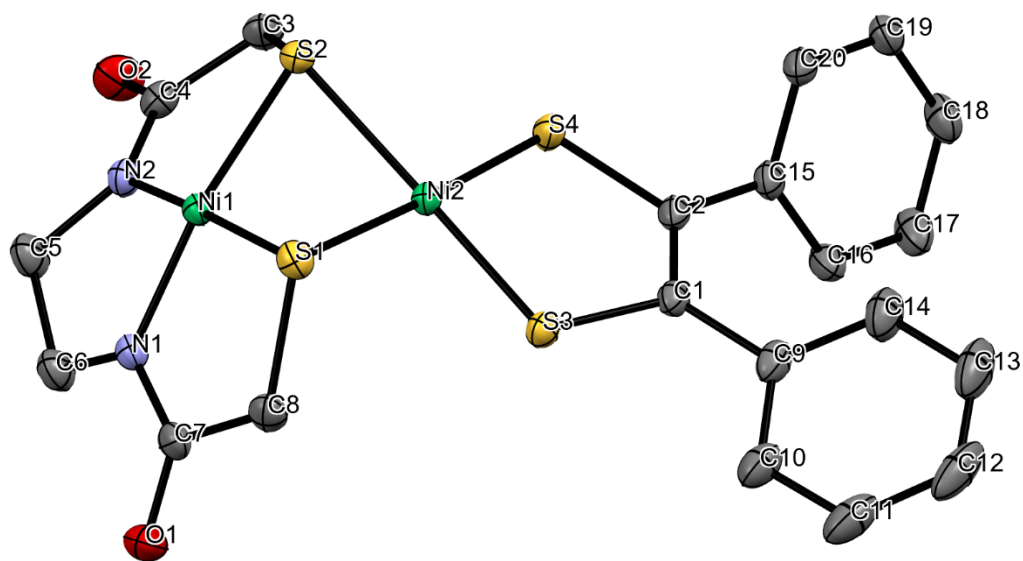

Figure S17. Thermal ellipsoid plot of  $2^{2-}$  (50%, hydrogens and  $\text{NEt}_4^+$  cations omitted for clarity).

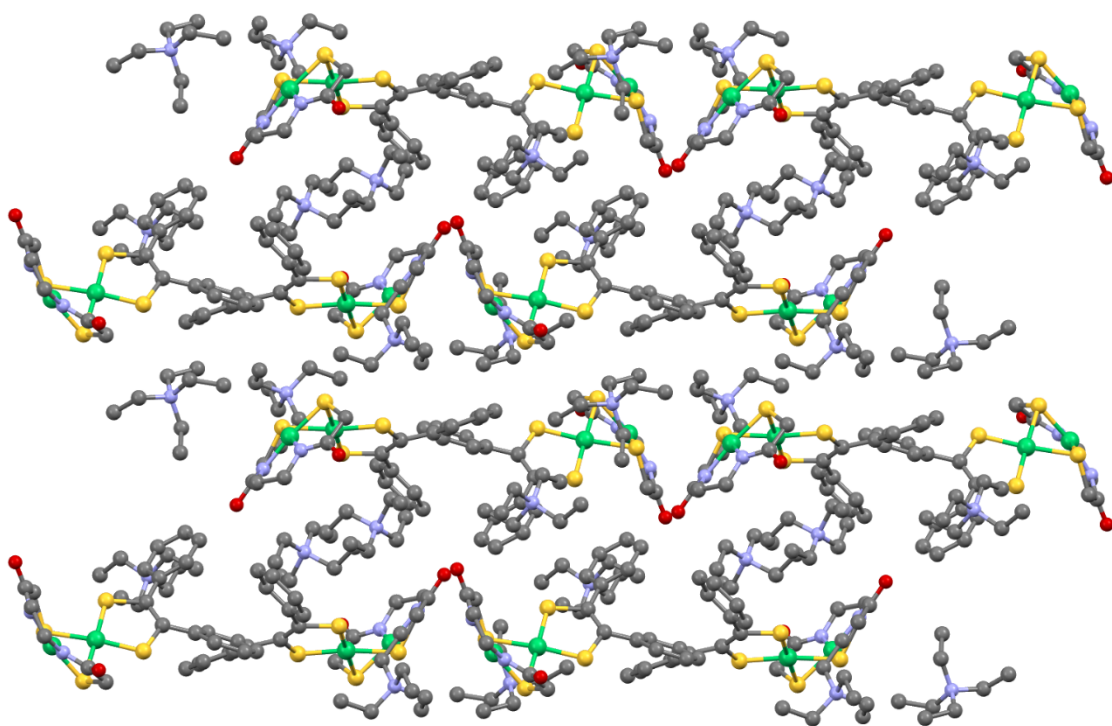

Figure S18. X-ray crystal packing of  $2^{2-}$  along the  $b$  axis.

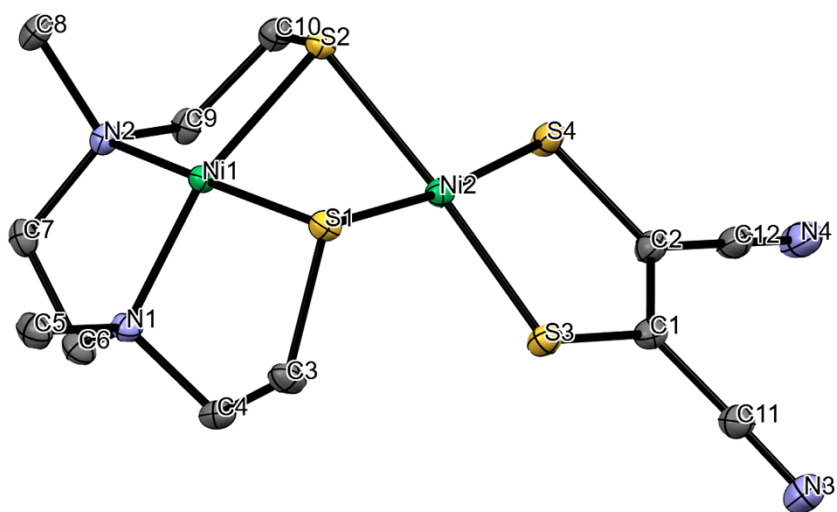

**Figure S19.** Thermal ellipsoid plot of **3** (50%, hydrogens omitted for clarity).

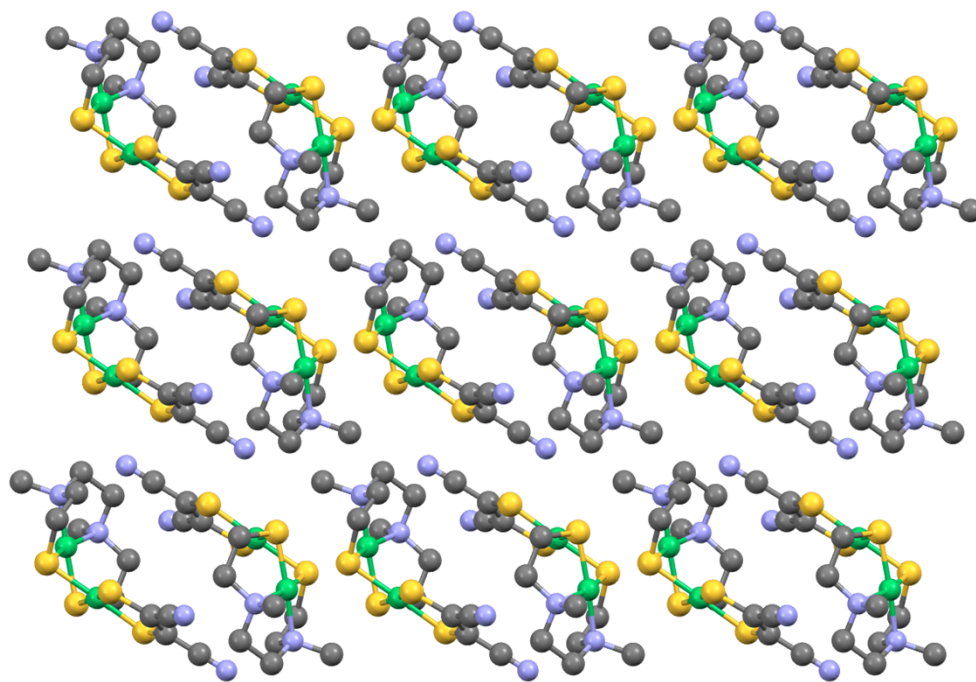

**Figure S20.** X-ray crystal packing of **3** along the  $a$  axis.

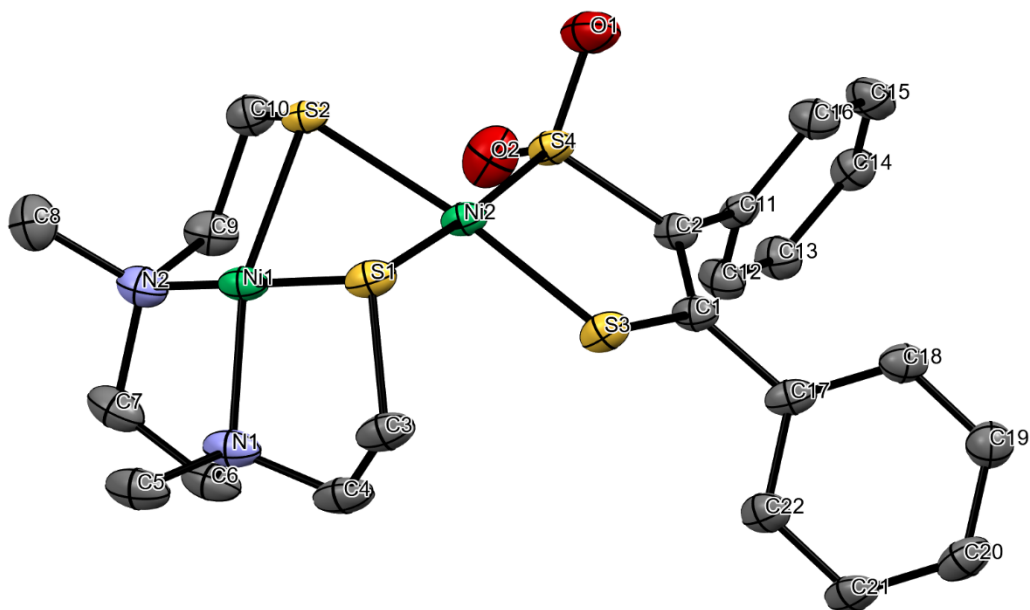

Figure S21. Thermal ellipsoid plot of **1<sub>o2</sub>** (50%, hydrogens and solvent molecules omitted for clarity).

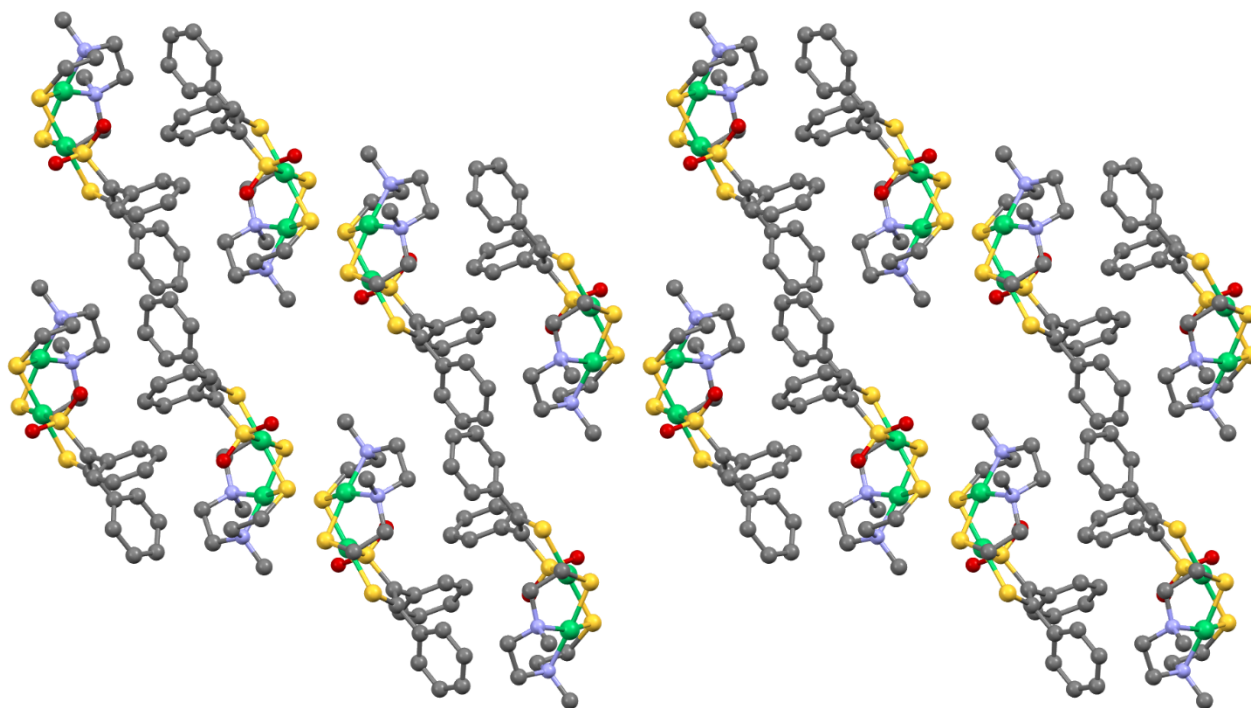

Figure S22. X-ray crystal packing of **1<sub>o2</sub>** along the *b* axis.

**Table S3.** Crystal data and structure refinement for **1<sub>O2</sub>**.

| Identification code                         | Nibmedame_Nidpdt_O2_Q_Oma                                                                    |
|---------------------------------------------|----------------------------------------------------------------------------------------------|
| Empirical formula                           | C <sub>22</sub> H <sub>28</sub> N <sub>2</sub> Ni <sub>2</sub> O <sub>2</sub> S <sub>4</sub> |
| Formula weight                              | 598.12                                                                                       |
| Temperature/K                               | 110.0                                                                                        |
| Crystal system                              | monoclinic                                                                                   |
| Space group                                 | P2 <sub>1</sub> /n                                                                           |
| a/Å                                         | 10.8029(6)                                                                                   |
| b/Å                                         | 9.5412(5)                                                                                    |
| c/Å                                         | 25.5522(13)                                                                                  |
| α/°                                         | 90                                                                                           |
| β/°                                         | 94.968(2)                                                                                    |
| γ/°                                         | 90                                                                                           |
| Volume/Å <sup>3</sup>                       | 2623.8(2)                                                                                    |
| Z                                           | 4                                                                                            |
| ρ <sub>calc</sub> /g/cm <sup>3</sup>        | 1.514                                                                                        |
| μ/mm <sup>-1</sup>                          | 1.775                                                                                        |
| F(000)                                      | 1240.0                                                                                       |
| Crystal size/mm <sup>3</sup>                | 0.3 × 0.3 × 0.3                                                                              |
| Radiation                                   | MoKα (λ = 0.71073)                                                                           |
| 2θ range for data collection/°              | 4.234 to 51.402                                                                              |
| Index ranges                                | -13 ≤ h ≤ 13, -11 ≤ k ≤ 11, -31 ≤ l ≤ 31                                                     |
| Reflections collected                       | 57183                                                                                        |
| Independent reflections                     | 4980 [R <sub>int</sub> = 0.0521, R <sub>sigma</sub> = 0.0212]                                |
| Data/restraints/parameters                  | 4980/0/291                                                                                   |
| Goodness-of-fit on F <sup>2</sup>           | 1.124                                                                                        |
| Final R indexes [I >= 2σ (I)]               | R <sub>1</sub> = 0.0371, wR <sub>2</sub> = 0.1091                                            |
| Final R indexes [all data]                  | R <sub>1</sub> = 0.0471, wR <sub>2</sub> = 0.1193                                            |
| Largest diff. peak/hole / e Å <sup>-3</sup> | 0.49/-0.41                                                                                   |

**Table S4.** Comparison of experimental and calculated XRD data for Ni(bme-dame)-Ni(dpdt) (**1**), [Ni(ema)-Ni(dpdt)]<sup>2-</sup> (**2<sup>2-</sup>**), and Ni(bme-dame)-Ni(dpdt) (**3**).

| Distances (Å)                    | <b>1</b>     |            | <b>2<sup>2-</sup></b> |            | <b>3</b>     |            |
|----------------------------------|--------------|------------|-----------------------|------------|--------------|------------|
|                                  | Experimental | Calculated | Experimental          | Calculated | Experimental | Calculated |
| Ni1–Ni2                          | 2.7202(5)    | 2.7142     | 2.6885(6)             | 2.6560     | 2.7871(3)    | 2.7190     |
| Ni1–S1                           | 2.1562(7)    | 2.1714     | 2.1383(5)             | 2.1761     | 2.1436(4)    | 2.1711     |
| Ni1–S2                           | 2.1651(6)    | 2.1784     | 2.1446(7)             | 2.1734     | 2.1544(4)    | 2.1750     |
| Ni1–N1                           | 1.951(2)     | 1.9518     | 1.8444(2)             | 1.8634     | 1.938(1)     | 1.9493     |
| Ni1–N2                           | 1.952(2)     | 1.9619     | 1,838(2)              | 1.8538     | 1.932(1)     | 1.9590     |
| Ni2–S1                           | 2.2398(6)    | 2.2821     | 2.2611(6)             | 2.3181     | 2.2412(4)    | 2.2788     |
| Ni2–S2                           | 2.2398(7)    | 2.2816     | 2.2809(5)             | 2.3103     | 2.2302(4)    | 2.2770     |
| Ni2–S3                           | 2.1339(7)    | 2.1653     | 2.1338(5)             | 2.1657     | 2.1497(4)    | 2.1688     |
| Ni2–S4                           | 2.1461(6)    | 2.1658     | 2.1340(6)             | 2.1657     | 2.1493(4)    | 2.1686     |
| S3–C1                            | 1.766(2)     | 1.7830     | 1.772(2)              | 1.7833     | 1.738(2)     | 1.7597     |
| S4–C2                            | 1.764(2)     | 1.7836     | 1.760(2)              | 1.7845     | 1.737(1)     | 1.7593     |
| C1–C2                            | 1.348(3)     | 1.3678     | 1.356(2)              | 1.3706     | 1.361(2)     | 1.3853     |
| Ni1 <sub>disp</sub> <sup>a</sup> | 0.250        | 0.183      | 0.150                 | 0.153      | 0.207        | 0.190      |
| <b>Angles</b>                    |              |            |                       |            |              |            |
| S1–Ni1–S2                        | 85.32(2)     | 86.16      | 90.18(2)              | 90.36      | 86.36(3)     | 85.76      |
| S1–Ni2–S2                        | 81.64(2)     | 81.31      | 83.80(2)              | 83.60      | 82.26(3)     | 80.96      |
| S1–Ni2–S3                        | 92.33(2)     | 94.22      | 91.24(2)              | 92.89      | 92.24(1)     | 93.05      |
| S2–Ni2–S4                        | 94.94(2)     | 93.92      | 94.00(2)              | 92.8       | 92.14(1)     | 93.08      |
| S3–Ni2–S4                        | 91.22(2)     | 90.72      | 90.81(2)              | 91.00      | 93.39(2)     | 92.90      |
| Hinge <sup>b</sup>               | 111.82       | 109.56     | 114.08                | 109.07     | 117.98       | 109.13     |

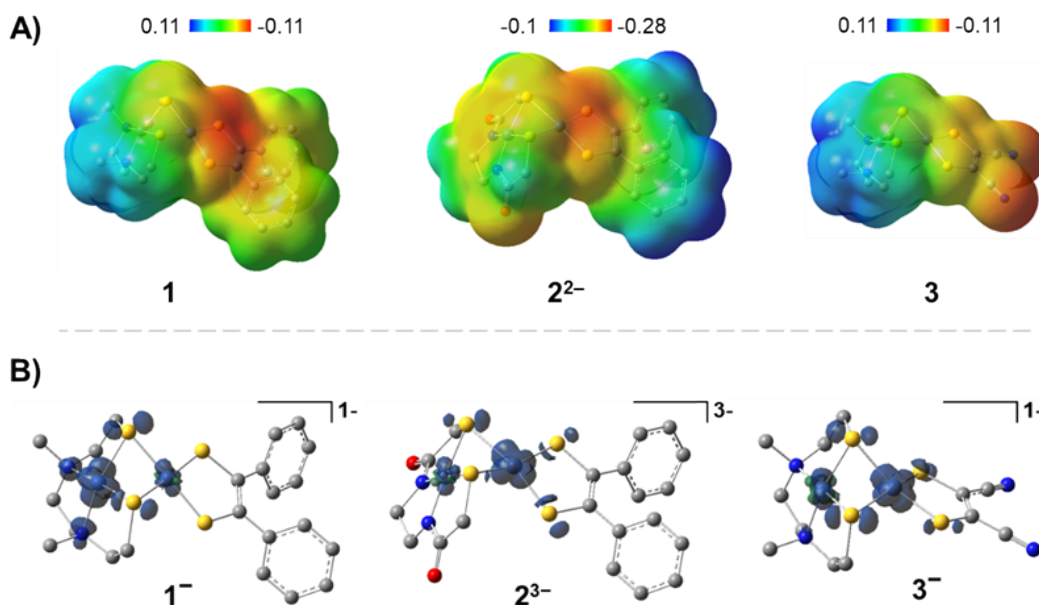

**Figure S23.** A) ESP maps (color scale at a.u.) of **1**, **2<sup>2-</sup>** and **3** (iso surface values = 0.001 au). B) Spin Density plots of reduced complexes **1<sup>-</sup>**, **2<sup>3-</sup>** and **3<sup>-</sup>** (iso values = 0.001).

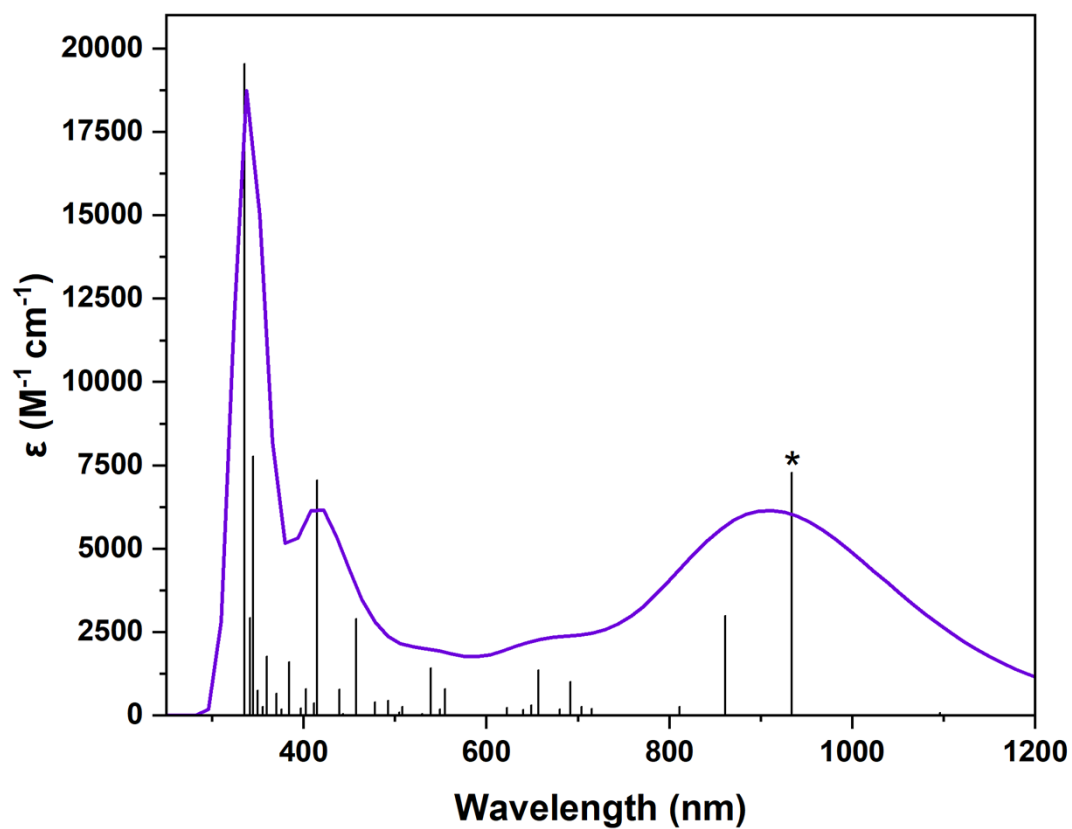

**Figure S24.** TD-DFT calculated electronic absorption spectrum of **1<sup>+</sup>**. Asterisk is excited state 9 which is shown in the main paper as the major contributing transition.



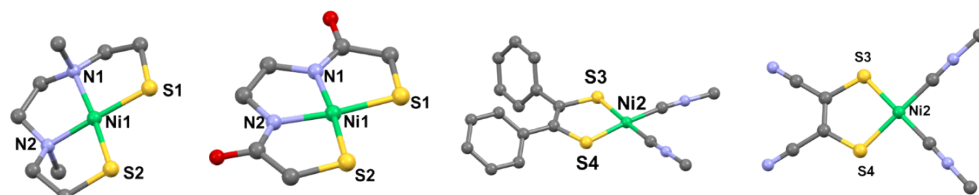

|         |       |       |
|---------|-------|-------|
| S-C (Å) | 1.736 | 1.760 |
|         | 1.731 | 1.772 |
| C-C (Å) | 1.356 | 1.347 |

|                        |                |       |                |                |
|------------------------|----------------|-------|----------------|----------------|
| Ni-S (Å)               | 2.166<br>2.173 | 2.179 | 2.139<br>2.149 | 2.146<br>2.144 |
| Ni-N (Å)               | 1.942<br>1.931 | 1.858 | --             | --             |
| ∠S-Ni-S (°)            | 93.99          | 97.47 | 90.03          | 92.80          |
| ∠N-Ni-N (°)            | 88.31          | 85.58 | --             | --             |
| Ni <sub>disp</sub> (Å) | 0.003          | 0.027 | 0.007          | 0.012          |
| τ <sub>4</sub>         | 0.13           | 0.09  | 0.07           | 0.01           |

**Figure S25:** Selected bond angles and lengths for the previously reported donor and receiver synthons.<sup>1-4</sup>

## Computational coordinates of optimized structures

### Complex 1 (neutral closed shell singlet)

|    |             |             |              |
|----|-------------|-------------|--------------|
| Ni | -3.11810040 | 0.02440529  | -0.27792077  |
| Ni | -0.52407220 | -0.03944885 | -1.07413611  |
| S  | -2.17499129 | 1.42969935  | -1.64351421  |
| S  | -2.19455165 | -1.53909172 | -1.48127129  |
| S  | 0.96560537  | -1.57048331 | -0.717238833 |
| S  | 0.92345948  | 1.50992523  | -0.63523820  |
| N  | -3.46589737 | 1.42714973  | 1.03393422   |
| N  | -3.80463700 | -1.30904668 | 0.98686435   |
| C  | -2.21849701 | 2.92384920  | -0.52878073  |
| H  | -3.04491129 | 3.54840090  | -0.88170071  |
| H  | -1.28462106 | 3.48098096  | -0.64944057  |
| C  | -2.38509818 | 2.47327177  | 0.91186471   |
| H  | -2.62552773 | 3.31950124  | 1.57225647   |
| H  | -1.45655834 | 2.00351787  | 1.24848056   |

|   |             |             |             |
|---|-------------|-------------|-------------|
| C | -3.32011123 | 0.69691804  | 2.34462386  |
| H | -2.25459455 | 0.48195484  | 2.46730670  |
| H | -3.65384552 | 1.33227484  | 3.17653308  |
| C | -4.12164178 | -0.59355066 | 2.28229070  |
| H | -5.19509308 | -0.39024049 | 2.28774339  |
| H | -3.89308941 | -1.24152361 | 3.13661268  |
| C | -2.66244693 | -2.27747517 | 1.16939849  |
| H | -1.83679278 | -1.71442552 | 1.61472188  |
| H | -2.97469360 | -3.07194644 | 1.86409537  |
| C | -2.22961256 | -2.86740184 | -0.16841181 |
| H | -1.22642335 | -3.29515995 | -0.08986582 |
| H | -2.91475755 | -3.64233799 | -0.52476838 |
| C | -4.81865850 | 2.05002340  | 0.90288872  |
| H | -5.58781335 | 1.27603232  | 0.94363680  |
| H | -4.97300510 | 2.77028615  | 1.71832166  |
| H | -4.88695067 | 2.56188337  | -0.05919114 |
| C | -5.03082610 | -2.01631885 | 0.50499853  |
| H | -5.35244848 | -2.75341719 | 1.25406669  |
| H | -5.82147098 | -1.27811001 | 0.35100793  |
| H | -4.82243892 | -2.51943994 | -0.44067139 |
| C | 2.45200838  | -0.70590999 | -0.24354744 |
| C | 2.43999378  | 0.66265542  | -0.23307573 |
| C | 3.58018475  | -1.56982914 | 0.18172983  |
| C | 4.28760771  | -1.31051109 | 1.37679140  |
| H | 4.00285589  | -0.45841685 | 1.98954569  |
| C | 5.33422997  | -2.14112399 | 1.78844707  |
| H | 5.86121362  | -1.92151988 | 2.71520712  |
| C | 5.69610328  | -3.25825859 | 1.02314678  |
| H | 6.50896885  | -3.90543966 | 1.34571875  |
| C | 4.99434426  | -3.53770275 | -0.15689184 |
| H | 5.26426849  | -4.40276859 | -0.75983011 |
| C | 3.94795527  | -2.70695368 | -0.57082408 |
| H | 3.41440657  | -2.92868558 | -1.49261278 |
| C | 3.61104859  | 1.54149025  | 0.00724038  |
| C | 4.84116241  | 1.31074363  | -0.64738312 |
| H | 4.92942107  | 0.47131275  | -1.33319301 |

|   |            |            |             |
|---|------------|------------|-------------|
| C | 5.93629673 | 2.15468034 | -0.43862096 |
| H | 6.87231095 | 1.95833388 | -0.95831536 |
| C | 5.82942065 | 3.25494723 | 0.42305944  |
| H | 6.68139650 | 3.91239991 | 0.58283957  |
| C | 4.61156766 | 3.50515764 | 1.06910903  |
| H | 4.51547143 | 4.35684544 | 1.74002974  |
| C | 3.51515757 | 2.66177833 | 0.86139141  |
| H | 2.57581264 | 2.86053589 | 1.37299272  |

### Complex [1]<sup>+</sup> (cation doublet)

|    |             |             |             |
|----|-------------|-------------|-------------|
| Ni | -3.07218756 | 0.06167977  | -0.26385003 |
| Ni | -0.58130245 | 0.03891308  | -1.06503043 |
| S  | -2.19394567 | 1.55502506  | -1.57992842 |
| S  | -2.22917902 | -1.42751668 | -1.61728719 |
| S  | 0.86515877  | -1.51721464 | -0.66851261 |
| S  | 0.93636340  | 1.53790291  | -0.70851514 |
| N  | -3.32938151 | 1.37225536  | 1.15428739  |
| N  | -3.69564226 | -1.34818566 | 0.94779332  |
| C  | -2.17434021 | 2.97737625  | -0.37607805 |
| H  | -3.02205210 | 3.60997772  | -0.65560033 |
| H  | -1.25312911 | 3.55076876  | -0.51548284 |
| C  | -2.26964124 | 2.44220170  | 1.04203017  |
| H  | -2.49720324 | 3.24773686  | 1.75384906  |
| H  | -1.32239155 | 1.97347110  | 1.32124554  |
| C  | -3.09667126 | 0.55476080  | 2.40229683  |
| H  | -2.02744108 | 0.32554911  | 2.43171255  |
| H  | -3.36325727 | 1.13919009  | 3.29257722  |
| C  | -3.91517370 | -0.72137235 | 2.31176084  |
| H  | -4.98331448 | -0.51392000 | 2.40761576  |
| H  | -3.63181649 | -1.42981081 | 3.09780963  |
| C  | -2.57272258 | -2.35446634 | 0.98781973  |
| H  | -1.70821578 | -1.84812014 | 1.42654520  |
| H  | -2.86836365 | -3.19288660 | 1.63465431  |
| C  | -2.23921507 | -2.85156975 | -0.41357496 |

|   |             |             |             |
|---|-------------|-------------|-------------|
| H | -1.25706826 | -3.33256806 | -0.43074501 |
| H | -2.97779003 | -3.56071824 | -0.79758709 |
| C | -4.69898154 | 1.97590801  | 1.13457824  |
| H | -5.45012778 | 1.18351305  | 1.13264083  |
| H | -4.82879278 | 2.61221863  | 2.01978112  |
| H | -4.81501296 | 2.57366390  | 0.22825835  |
| C | -4.97081642 | -1.98105591 | 0.48303754  |
| H | -5.27182729 | -2.76081077 | 1.19506757  |
| H | -5.74264230 | -1.20950493 | 0.43095975  |
| H | -4.83153148 | -2.41914027 | -0.50661011 |
| C | 2.35318028  | -0.71241970 | -0.23089001 |
| C | 2.38982040  | 0.67577422  | -0.26393103 |
| C | 3.46631714  | -1.59223458 | 0.19670299  |
| C | 4.16174849  | -1.34047857 | 1.39859811  |
| H | 3.88339011  | -0.48685457 | 2.01140261  |
| C | 5.18732753  | -2.19290370 | 1.81527350  |
| H | 5.70851709  | -1.98965240 | 2.74830750  |
| C | 5.53918799  | -3.30745091 | 1.04212864  |
| H | 6.34042177  | -3.96721796 | 1.36742281  |
| C | 4.85187692  | -3.56921769 | -0.14991122 |
| H | 5.12095444  | -4.43024394 | -0.75785617 |
| C | 3.82052850  | -2.72369910 | -0.56799505 |
| H | 3.29854036  | -2.92534185 | -1.50065532 |
| C | 3.59204392  | 1.50944587  | -0.02721379 |
| C | 4.80957292  | 1.21809378  | -0.67862615 |
| H | 4.86586026  | 0.36987232  | -1.35610261 |
| C | 5.93139136  | 2.02586046  | -0.47673119 |
| H | 6.86022152  | 1.79358907  | -0.99324176 |
| C | 5.86101020  | 3.13363202  | 0.37881689  |
| H | 6.73730174  | 3.75828406  | 0.53697382  |
| C | 4.65588246  | 3.43487956  | 1.02581174  |
| H | 4.59396165  | 4.29133921  | 1.69366819  |
| C | 3.52822571  | 2.63472833  | 0.82116328  |
| H | 2.59802488  | 2.86662803  | 1.33496873  |

**Complex [1]<sup>-</sup> (anion doublet)**

|    |             |             |             |
|----|-------------|-------------|-------------|
| Ni | -3.12913849 | 0.04678318  | -0.37134394 |
| Ni | -0.55931310 | -0.01931907 | -1.06969698 |
| S  | -2.14804236 | 1.56365812  | -1.67442701 |
| S  | -2.17145169 | -1.61068899 | -1.54567817 |
| S  | 0.94725287  | -1.57305752 | -0.72203048 |
| S  | 0.92660577  | 1.52787620  | -0.61433017 |
| N  | -3.44149119 | 1.46470514  | 1.11052550  |
| N  | -3.87217295 | -1.34703453 | 0.98642619  |
| C  | -2.14824813 | 2.96045640  | -0.43816312 |
| H  | -2.95479174 | 3.64039513  | -0.73558506 |
| H  | -1.20057101 | 3.50406740  | -0.50761935 |
| C  | -2.32120609 | 2.44359204  | 0.99042218  |
| H  | -2.48015540 | 3.28802560  | 1.68382980  |
| H  | -1.40569166 | 1.91564919  | 1.27581612  |
| C  | -3.31658023 | 0.65710031  | 2.35934176  |
| H  | -2.25840636 | 0.39688235  | 2.46684920  |
| H  | -3.62126010 | 1.23869281  | 3.24514216  |
| C  | -4.16676886 | -0.61173655 | 2.25705582  |
| H  | -5.23002160 | -0.35416634 | 2.24309063  |
| H  | -3.99222907 | -1.25295802 | 3.13391483  |
| C  | -2.71129445 | -2.27437361 | 1.15360320  |
| H  | -1.89481553 | -1.69290795 | 1.59443751  |
| H  | -2.98391605 | -3.08557437 | 1.85252295  |
| C  | -2.24295120 | -2.87502787 | -0.17638547 |
| H  | -1.24585402 | -3.30565086 | -0.04306798 |
| H  | -2.91583149 | -3.66843276 | -0.52091718 |
| C  | -4.75086466 | 2.16091506  | 1.04268917  |
| H  | -5.56382744 | 1.43205252  | 1.09398278  |
| H  | -4.85473720 | 2.87942190  | 1.87297288  |
| H  | -4.82678395 | 2.69482613  | 0.09167187  |
| C  | -5.07359231 | -2.09771427 | 0.54144297  |

|   |             |             |             |
|---|-------------|-------------|-------------|
| H | -5.34905826 | -2.87658740 | 1.27196139  |
| H | -5.90714335 | -1.39925875 | 0.42519102  |
| H | -4.87170541 | -2.56602930 | -0.42565069 |
| C | 2.43427705  | -0.71531206 | -0.23927196 |
| C | 2.43202783  | 0.65867805  | -0.22135796 |
| C | 3.56171728  | -1.57594401 | 0.19457523  |
| C | 4.27102505  | -1.30818068 | 1.38822261  |
| H | 3.98807428  | -0.44910116 | 1.99223047  |
| C | 5.31478286  | -2.13691843 | 1.81169022  |
| H | 5.83942533  | -1.90838761 | 2.73790514  |
| C | 5.67671063  | -3.26338001 | 1.06005615  |
| H | 6.48702916  | -3.90952962 | 1.39130166  |
| C | 4.97459122  | -3.55268530 | -0.11828204 |
| H | 5.24277726  | -4.42516755 | -0.71168434 |
| C | 3.93016952  | -2.72467339 | -0.54199645 |
| H | 3.39410983  | -2.95750411 | -1.45959841 |
| C | 3.62323445  | 1.51433610  | 0.00577601  |
| C | 4.84407090  | 1.25930014  | -0.65949683 |
| H | 4.91021187  | 0.41436510  | -1.34127582 |
| C | 5.95718753  | 2.08442390  | -0.46971226 |
| H | 6.88286158  | 1.86775963  | -1.00021495 |
| C | 5.88178581  | 3.19216570  | 0.38589846  |
| H | 6.74719027  | 3.83548211  | 0.53108052  |
| C | 4.67502353  | 3.46745455  | 1.04373198  |
| H | 4.60151387  | 4.32520930  | 1.71014489  |
| C | 3.56093576  | 2.64361118  | 0.85270761  |
| H | 2.62986567  | 2.86460875  | 1.37022128  |

**Complex 2<sup>2-</sup>** (dianion closed shell singlet)

|    |            |             |             |
|----|------------|-------------|-------------|
| Ni | 3.16659209 | -0.00114830 | -0.35434799 |
| Ni | 0.61843884 | 0.05675406  | -1.10112248 |
| S  | 2.26633180 | -1.46298925 | -1.69126787 |
| S  | 2.27564648 | 1.61621195  | -1.50062270 |

|   |             |             |             |
|---|-------------|-------------|-------------|
| S | -0.88223384 | 1.58130664  | -0.76275793 |
| S | -0.80898697 | -1.50456115 | -0.63738660 |
| O | 3.22494719  | -3.45919208 | 1.67378889  |
| O | 3.69668478  | 3.32998528  | 1.85226808  |
| N | 3.65469955  | -1.34080740 | 0.84525490  |
| N | 3.75886110  | 1.20106703  | 0.92651691  |
| C | 2.39987080  | -2.90909244 | -0.52566577 |
| H | 1.38995006  | -3.25253320 | -0.27723492 |
| H | 2.91106979  | -3.71730545 | -1.06190829 |
| C | 3.14644612  | -2.58453456 | 0.77212331  |
| C | 4.17672094  | -0.85534902 | 2.14287533  |
| H | 5.00246059  | -1.48406689 | 2.50231991  |
| H | 3.37356002  | -0.90114929 | 2.89430839  |
| C | 4.63806464  | 0.59870993  | 1.94338050  |
| H | 4.59768586  | 1.16460063  | 2.88227779  |
| H | 5.67705882  | 0.61698754  | 1.58023192  |
| C | 3.36671510  | 2.48383234  | 0.97999043  |
| C | 2.40704404  | 2.89375315  | -0.14432910 |
| H | 2.74883469  | 3.82994456  | -0.59851927 |
| H | 1.40490383  | 3.05602329  | 0.26844056  |
| C | -2.35223534 | 0.70626022  | -0.25483172 |
| C | -2.32693991 | -0.66375114 | -0.22588141 |
| C | -3.48423815 | 1.56064576  | 0.17862568  |
| C | -3.87776613 | 2.68660258  | -0.57843002 |
| H | -3.35964303 | 2.90656241  | -1.50939879 |
| C | -4.92860770 | 3.50823665  | -0.15764127 |
| H | -5.21739207 | 4.36434380  | -0.76481194 |
| C | -5.61059877 | 3.23180510  | 1.03484167  |
| H | -6.42658712 | 3.87227593  | 1.36310093  |
| C | -5.22302023 | 2.12686913  | 1.80541964  |
| H | -5.73296148 | 1.91012129  | 2.74243357  |
| C | -4.17195039 | 1.30552006  | 1.38649154  |
| H | -3.86699360 | 0.46390068  | 2.00400864  |
| C | -3.48944079 | -1.54635633 | 0.04001072  |

|   |             |             |             |
|---|-------------|-------------|-------------|
| C | -4.73210160 | -1.32983245 | -0.59653243 |
| H | -4.83696347 | -0.49696773 | -1.28812189 |
| C | -5.81862115 | -2.17880563 | -0.36392184 |
| H | -6.76369642 | -1.99262327 | -0.87104499 |
| C | -5.69171338 | -3.27146080 | 0.50484958  |
| H | -6.53687634 | -3.93302380 | 0.68327338  |
| C | -4.46185587 | -3.50817338 | 1.13340961  |
| H | -4.34916939 | -4.35369153 | 1.80966108  |
| C | -3.37421233 | -2.65981378 | 0.90130654  |
| H | -2.42556591 | -2.84840661 | 1.39931408  |

### Complex 2<sup>-</sup> (anion doublet)

|    |             |             |             |
|----|-------------|-------------|-------------|
| Ni | 3.06820301  | -0.00931754 | -0.29143899 |
| Ni | 0.72987639  | 0.06047210  | -1.11707005 |
| S  | 2.34134698  | -1.46854605 | -1.74371911 |
| S  | 2.36161617  | 1.62256271  | -1.55628710 |
| S  | -0.77553122 | 1.56675739  | -0.77982895 |
| S  | -0.71453626 | -1.48843690 | -0.68263571 |
| O  | 2.92884789  | -3.48684694 | 1.67632838  |
| O  | 3.45334908  | 3.33751142  | 1.89810680  |
| N  | 3.39970976  | -1.34771910 | 0.94744963  |
| N  | 3.51349757  | 1.18767162  | 1.04349631  |
| C  | 2.36347517  | -2.92777048 | -0.59698310 |
| H  | 1.34488339  | -3.31354482 | -0.48627452 |
| H  | 2.96883992  | -3.70209103 | -1.08171936 |
| C  | 2.93108580  | -2.60496666 | 0.78913580  |
| C  | 3.73741974  | -0.86730410 | 2.30882991  |
| H  | 4.49705638  | -1.50784812 | 2.77351933  |
| H  | 2.83465982  | -0.90450229 | 2.93572770  |
| C  | 4.23987610  | 0.57797465  | 2.17486201  |
| H  | 4.07267393  | 1.14817244  | 3.09576257  |
| H  | 5.31751426  | 0.58734130  | 1.95626697  |
| C  | 3.18201146  | 2.49304088  | 1.01488903  |



|   |             |             |             |
|---|-------------|-------------|-------------|
| C | 2.38994719  | 2.92370987  | -0.22654524 |
| H | 2.84257782  | 3.82031477  | -0.66179566 |
| H | 1.35885559  | 3.16032696  | 0.05828590  |
| C | -2.23137609 | 0.71426117  | -0.27649900 |
| C | -2.21101844 | -0.66458805 | -0.26029020 |
| C | -3.36556184 | 1.56862647  | 0.15191743  |
| C | -3.78173794 | 2.66402692  | -0.63385324 |
| H | -3.28803420 | 2.85987357  | -1.58318467 |
| C | -4.83356729 | 3.48444507  | -0.21464259 |
| H | -5.14633554 | 4.31869227  | -0.83920764 |
| C | -5.48521001 | 3.23243084  | 0.99937665  |
| H | -6.30239144 | 3.87215052  | 1.32546591  |
| C | -5.07335171 | 2.15405124  | 1.79394467  |
| H | -5.56475699 | 1.95810199  | 2.74479249  |
| C | -4.02357986 | 1.33069212  | 1.37749939  |
| H | -3.69790467 | 0.50721878  | 2.00830451  |
| C | -3.37473711 | -1.54373806 | 0.01143599  |
| C | -4.60906329 | -1.32742690 | -0.63756578 |
| H | -4.70749803 | -0.50224252 | -1.33865118 |
| C | -5.69512467 | -2.17504783 | -0.40228104 |
| H | -6.63708880 | -1.99650041 | -0.91685176 |
| C | -5.57147833 | -3.25485905 | 0.48247140  |
| H | -6.41834947 | -3.91287054 | 0.66464879  |
| C | -4.34884337 | -3.48470996 | 1.12597633  |
| H | -4.24336646 | -4.31956147 | 1.81569464  |
| C | -3.25888071 | -2.64093794 | 0.89047394  |
| H | -2.31562515 | -2.81919812 | 1.40198602  |

### Complex 2<sup>3-</sup> (trianion doublet)

|    |             |             |             |
|----|-------------|-------------|-------------|
| Ni | -3.14542540 | -0.11220680 | -0.33340795 |
| Ni | -0.62704041 | -0.24119774 | -1.02952476 |
| S  | -2.40967746 | 1.12750187  | -1.98822842 |
| S  | -2.39166659 | -1.97315455 | -1.21313507 |

|   |             |             |             |
|---|-------------|-------------|-------------|
| S | 1.06166616  | -1.70444811 | -0.78688019 |
| S | 0.73827311  | 1.44787440  | -0.40200662 |
| O | -3.45666757 | 3.70908504  | 0.93914362  |
| O | -3.89555934 | -3.04773269 | 2.36157575  |
| N | -3.67423859 | 1.42611946  | 0.59716422  |
| N | -3.75417070 | -1.06687679 | 1.15327806  |
| C | -2.61867991 | 2.76615040  | -1.12511869 |
| H | -1.62848971 | 3.21232681  | -0.97746732 |
| H | -3.19356936 | 3.43521644  | -1.77761567 |
| C | -3.30476256 | 2.66649235  | 0.24043614  |
| C | -4.15596136 | 1.18223445  | 1.97203238  |
| H | -4.97239124 | 1.86727293  | 2.23984382  |
| H | -3.33242905 | 1.35883127  | 2.68270549  |
| C | -4.61606640 | -0.28338574 | 2.05326802  |
| H | -4.56336618 | -0.66237987 | 3.08244219  |
| H | -5.66364423 | -0.36509435 | 1.72016037  |
| C | -3.48143074 | -2.35906312 | 1.38498971  |
| C | -2.54853804 | -2.98867094 | 0.34463731  |
| H | -2.91767747 | -3.98594489 | 0.07978656  |
| H | -1.54969477 | -3.10225836 | 0.78555206  |
| C | 2.44811472  | -0.70992372 | -0.27031228 |
| C | 2.31011020  | 0.65872723  | -0.12066040 |
| C | 3.68583329  | -1.45648664 | 0.06700306  |
| C | 4.20469795  | -2.44954377 | -0.79744209 |
| H | 3.69196894  | -2.64499737 | -1.73696431 |
| C | 5.35869457  | -3.16859911 | -0.47228201 |
| H | 5.73878222  | -3.91677266 | -1.16645912 |
| C | 6.02834383  | -2.93132856 | 0.73815892  |
| H | 6.92292797  | -3.49550736 | 0.99427232  |
| C | 5.52064975  | -1.96422947 | 1.61680964  |
| H | 6.01697779  | -1.77888084 | 2.56834652  |
| C | 4.36928315  | -1.24043365 | 1.28787044  |
| H | 3.97969857  | -0.50479588 | 1.98825806  |
| C | 3.43882725  | 1.57876172  | 0.17095953  |

|   |            |            |             |
|---|------------|------------|-------------|
| C | 4.65450987 | 1.50833482 | -0.55002761 |
| H | 4.76701123 | 0.75194675 | -1.32388762 |
| C | 5.70210298 | 2.40215449 | -0.30072256 |
| H | 6.62082645 | 2.32708832 | -0.88070739 |
| C | 5.56990075 | 3.39802624 | 0.67691749  |
| H | 6.38327576 | 4.09494739 | 0.86910151  |
| C | 4.36860932 | 3.48964590 | 1.39668408  |
| H | 4.24888441 | 4.25712984 | 2.16001819  |
| C | 3.32031839 | 2.60016188 | 1.14282136  |
| H | 2.39176645 | 2.68315505 | 1.70374928  |

### Complex 3 (neutral closed shell singlet)

|    |             |             |             |
|----|-------------|-------------|-------------|
| Ni | -1.89202411 | 0.05651473  | -0.39238346 |
| Ni | 0.78579950  | -0.02541363 | -0.85502301 |
| S  | -0.83778935 | -1.47825713 | -1.51657054 |
| S  | -0.76390453 | 1.47748231  | -1.58481414 |
| S  | 2.22228432  | 1.52194580  | -0.35900906 |
| S  | 2.11767998  | -1.61730457 | -0.22678134 |
| N  | -2.74793170 | -1.29884390 | 0.73370503  |
| N  | -2.36868302 | 1.42048661  | 0.91606236  |
| N  | 5.62197375  | 2.00576343  | 1.08661367  |
| C  | 4.70999650  | 1.36521694  | 0.72630636  |
| C  | -2.38639325 | 0.64624113  | 2.21070312  |
| H  | -2.80201528 | 1.26416050  | 3.01797100  |
| H  | -1.34613206 | 0.40404515  | 2.44698152  |
| C  | 3.59119828  | 0.62268112  | 0.28455525  |
| C  | -0.92483734 | 2.94115395  | -0.43966396 |
| H  | -1.69951452 | 3.57682944  | -0.87920854 |
| H  | 0.01654532  | 3.49787764  | -0.43397564 |
| C  | -3.19880947 | -0.62284974 | 2.01234931  |
| H  | -3.07753227 | -1.30641297 | 2.86025487  |
| H  | -4.26253890 | -0.39800248 | 1.90588495  |
| C  | -3.92758083 | -1.94252439 | 0.07512107  |

|   |             |             |             |
|---|-------------|-------------|-------------|
| H | -3.62137709 | -2.41451100 | -0.86000386 |
| H | -4.66957206 | -1.16995672 | -0.13968458 |
| H | -4.35982368 | -2.69655507 | 0.74715513  |
| C | -1.08305636 | -2.85859104 | -0.28422354 |
| H | -0.11964107 | -3.34242409 | -0.10171256 |
| H | -1.74485017 | -3.58213212 | -0.76935176 |
| N | 5.48677028  | -2.20473569 | 1.25057089  |
| C | -3.69162834 | 2.06347274  | 0.64509762  |
| H | -4.45959166 | 1.29465684  | 0.53839433  |
| H | -3.63189548 | 2.63131711  | -0.28538801 |
| H | -3.94931289 | 2.73583661  | 1.47462537  |
| C | -1.27115795 | 2.45600802  | 0.95663471  |
| H | -0.39710261 | 1.96930224  | 1.39819960  |
| H | -1.58528870 | 3.28915378  | 1.60181017  |
| C | -1.66424039 | -2.31060275 | 1.01361423  |
| H | -2.08304912 | -3.12331467 | 1.62530659  |
| H | -0.88713301 | -1.79480892 | 1.58519944  |
| C | 3.54622051  | -0.76080973 | 0.33974340  |
| C | 4.61643570  | -1.53713753 | 0.83993922  |

**Complex [3]<sup>+</sup> (cation doublet)**

|    |             |             |             |
|----|-------------|-------------|-------------|
| Ni | -1.86147288 | 0.06552751  | -0.39835066 |
| Ni | 0.70181106  | 0.00194833  | -0.79350632 |
| S  | -0.84199636 | -1.45936504 | -1.58856262 |
| S  | -0.76915207 | 1.52614796  | -1.59271826 |
| S  | 2.19216773  | 1.51325079  | -0.35636078 |
| S  | 2.03362877  | -1.59665047 | -0.18411047 |
| N  | -2.67005850 | -1.31331290 | 0.73605537  |
| N  | -2.29824552 | 1.40199019  | 0.95209679  |
| N  | 5.62407596  | 1.96601727  | 0.99755114  |
| C  | 4.69139256  | 1.34262255  | 0.67174990  |
| C  | -2.25573111 | 0.60267470  | 2.23495639  |
| H  | -2.63884568 | 1.20975148  | 3.06483595  |
| H  | -1.20531411 | 0.36252062  | 2.42150004  |
| C  | 3.54554528  | 0.61075311  | 0.27181612  |

|   |             |             |             |
|---|-------------|-------------|-------------|
| C | -0.91462814 | 2.96838151  | -0.42088323 |
| H | -1.70675136 | 3.59376232  | -0.84336763 |
| H | 0.01863778  | 3.53880888  | -0.43665424 |
| C | -3.07048383 | -0.66389726 | 2.04958352  |
| H | -2.90316688 | -1.36624301 | 2.87263746  |
| H | -4.13911876 | -0.44692657 | 1.99398135  |
| C | -3.88271942 | -1.91130916 | 0.08989572  |
| H | -3.61587271 | -2.36446144 | -0.86613947 |
| H | -4.61165315 | -1.11500406 | -0.07693628 |
| H | -4.30790173 | -2.67211271 | 0.75678838  |
| C | -1.06378338 | -2.86409507 | -0.38197001 |
| H | -0.10475633 | -3.37399529 | -0.25236717 |
| H | -1.75264180 | -3.55733556 | -0.87326703 |
| N | 5.41844874  | -2.25187260 | 1.19497605  |
| C | -3.64795220 | 2.01200502  | 0.72174588  |
| H | -4.39166783 | 1.22292693  | 0.59144539  |
| H | -3.61871050 | 2.62317150  | -0.18198027 |
| H | -3.90982188 | 2.63560739  | 1.58558304  |
| C | -1.22265637 | 2.46294029  | 0.97672255  |
| H | -0.33283767 | 1.99652478  | 1.40701300  |
| H | -1.54843497 | 3.28494471  | 1.62806006  |
| C | -1.59052854 | -2.34491668 | 0.94954070  |
| H | -2.00196170 | -3.17051854 | 1.54619462  |
| H | -0.79221703 | -1.85625796 | 1.51517923  |
| C | 3.47643074  | -0.77344801 | 0.34211342  |
| C | 4.54839002  | -1.57310642 | 0.81185696  |

### Complex [3]<sup>-</sup> (anion doublet)

|    |             |             |             |
|----|-------------|-------------|-------------|
| Ni | -1.85389031 | 0.20834083  | -0.38627390 |
| Ni | 0.74669114  | 0.13041197  | -0.82028583 |
| S  | -0.95145014 | -1.10402514 | -1.88993919 |
| S  | -0.77560535 | 1.91029845  | -1.25083217 |
| S  | 2.57436934  | 1.41949186  | -0.73774247 |
| S  | 1.77681651  | -1.54166580 | 0.27860900  |

|   |             |             |             |
|---|-------------|-------------|-------------|
| N | -2.81709888 | -1.33606059 | 0.40606672  |
| N | -2.25903798 | 1.24286119  | 1.24681636  |
| N | 6.10986004  | 1.36209159  | 0.43340085  |
| C | 5.03752935  | 0.90660600  | 0.27807640  |
| C | -2.31316343 | 0.17429540  | 2.30151290  |
| H | -2.68110326 | 0.58362032  | 3.25374311  |
| H | -1.28752478 | -0.18079276 | 2.44243843  |
| C | 3.73843659  | 0.39202126  | 0.08085276  |
| C | -0.78544126 | 3.00145026  | 0.26389046  |
| H | -1.51922199 | 3.79625310  | 0.09464963  |
| H | 0.20314462  | 3.45834246  | 0.37116870  |
| C | -3.20764697 | -0.95926306 | 1.81548767  |
| H | -3.13037757 | -1.83009496 | 2.47832717  |
| H | -4.25460028 | -0.64605779 | 1.79284287  |
| C | -4.03604334 | -1.73350054 | -0.35868435 |
| H | -3.76027207 | -1.97025289 | -1.38827253 |
| H | -4.73836720 | -0.89613903 | -0.36115529 |
| H | -4.50776315 | -2.60987186 | 0.11015445  |
| C | -1.28189256 | -2.71461625 | -1.00232985 |
| H | -0.34702361 | -3.28094303 | -0.94964464 |
| H | -1.99617886 | -3.28239740 | -1.60683135 |
| N | 5.08805324  | -2.42963597 | 1.72437152  |
| C | -3.53468566 | 2.01233677  | 1.18293080  |
| H | -4.36419293 | 1.33739213  | 0.96197913  |
| H | -3.46604619 | 2.75277112  | 0.38296380  |
| H | -3.71667597 | 2.51900738  | 2.14239035  |
| C | -1.10027553 | 2.16817868  | 1.49759309  |
| H | -0.24022698 | 1.53183552  | 1.72993326  |
| H | -1.32373119 | 2.80644956  | 2.36715265  |
| C | -1.80867162 | -2.45299919 | 0.40591882  |
| H | -2.27453008 | -3.35950844 | 0.82487749  |
| H | -0.98885939 | -2.13810729 | 1.05852793  |
| C | 3.39050573  | -0.89205666 | 0.52284114  |
| C | 4.32744983  | -1.71861398 | 1.17896289  |

## References:

1. H. J. Kruger, G. Peng and R. H. Holm, *Inorg. Chem.*, 1991, **30**, 734–742.
2. E. R. Hosler, R. W. Herbst, M. J. Maroney and B. S. Chohan, *Dalton Trans.*, 2011, **41**, 804–816.
3. K. D. Karlin and S. J. Lippard, *J. Am. Chem. Soc.*, 1976, **98**, 6951–6957
4. N. G. Connelly and W. E. Geiger, *Chem. Rev.*, 1996, **96**, 877–910.
